# Supplementary material for: Radiomics-based prediction of survival in patients with head and neck squamous cell carcinoma based on pre- and post-treatment 18F-PET/CT
Source: publisher site journal article supplement (doi:10.18632/aging.103508), 2020-07-16
Supplement: Supplementary file [file aging-v12i14-103508-supplementary-material-SD2.pdf]

**SUPPLEMENTARY FIGURES**

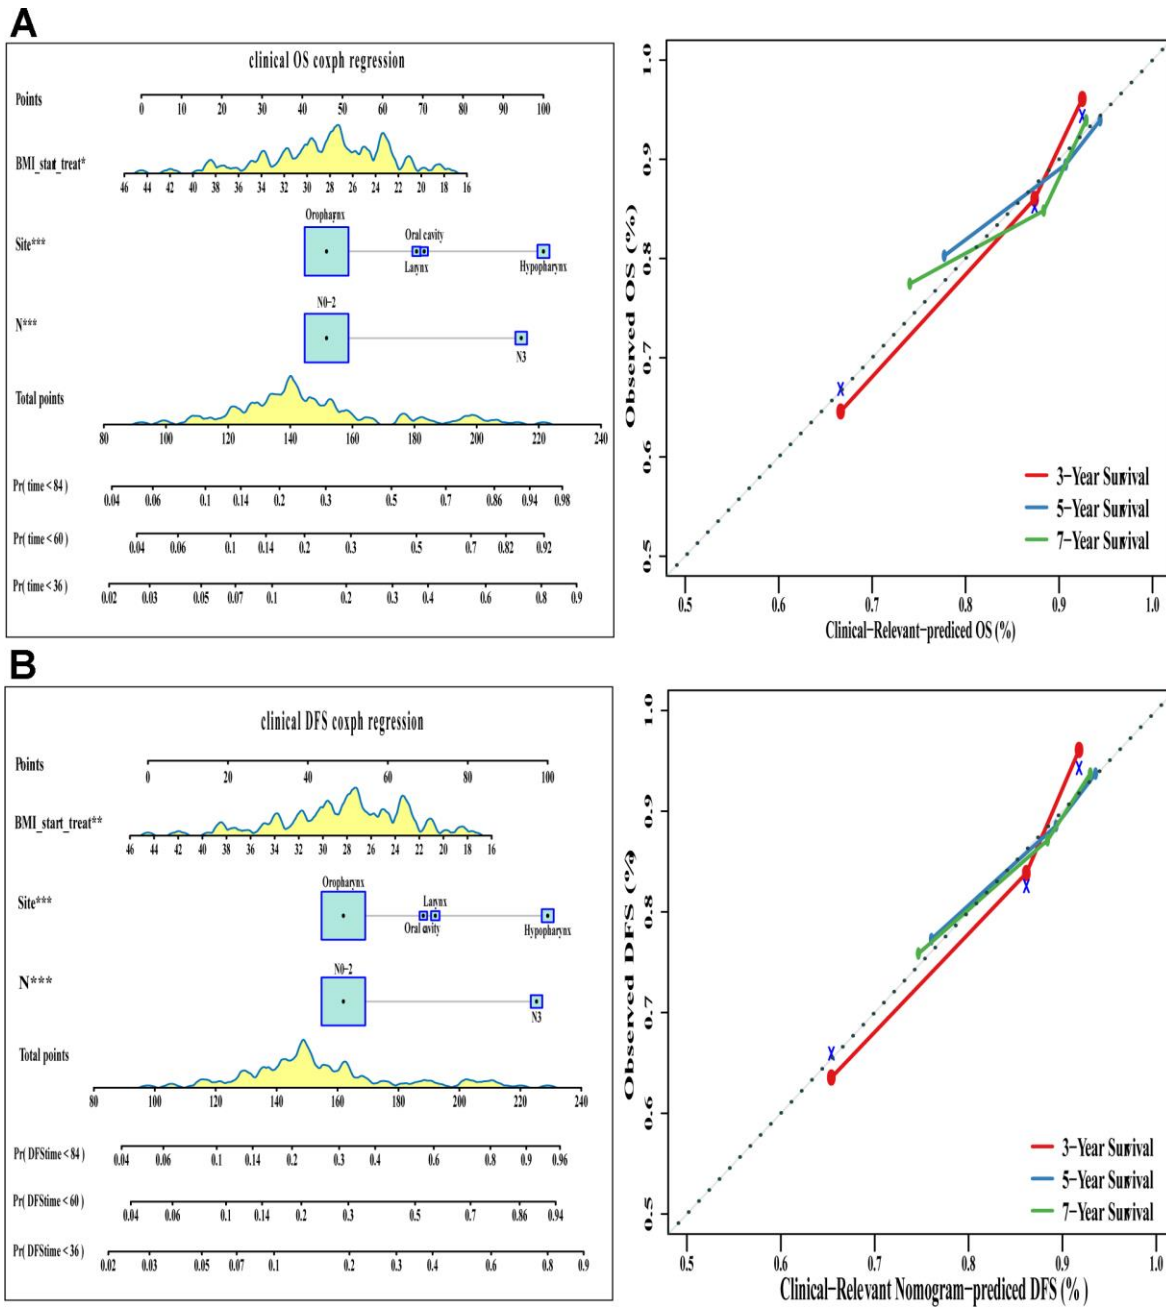

**Supplementary Figure 1. The clinical-relevant survival nomograms and their calibration plots. (A) OS-based model. (B) DFS-based model.**

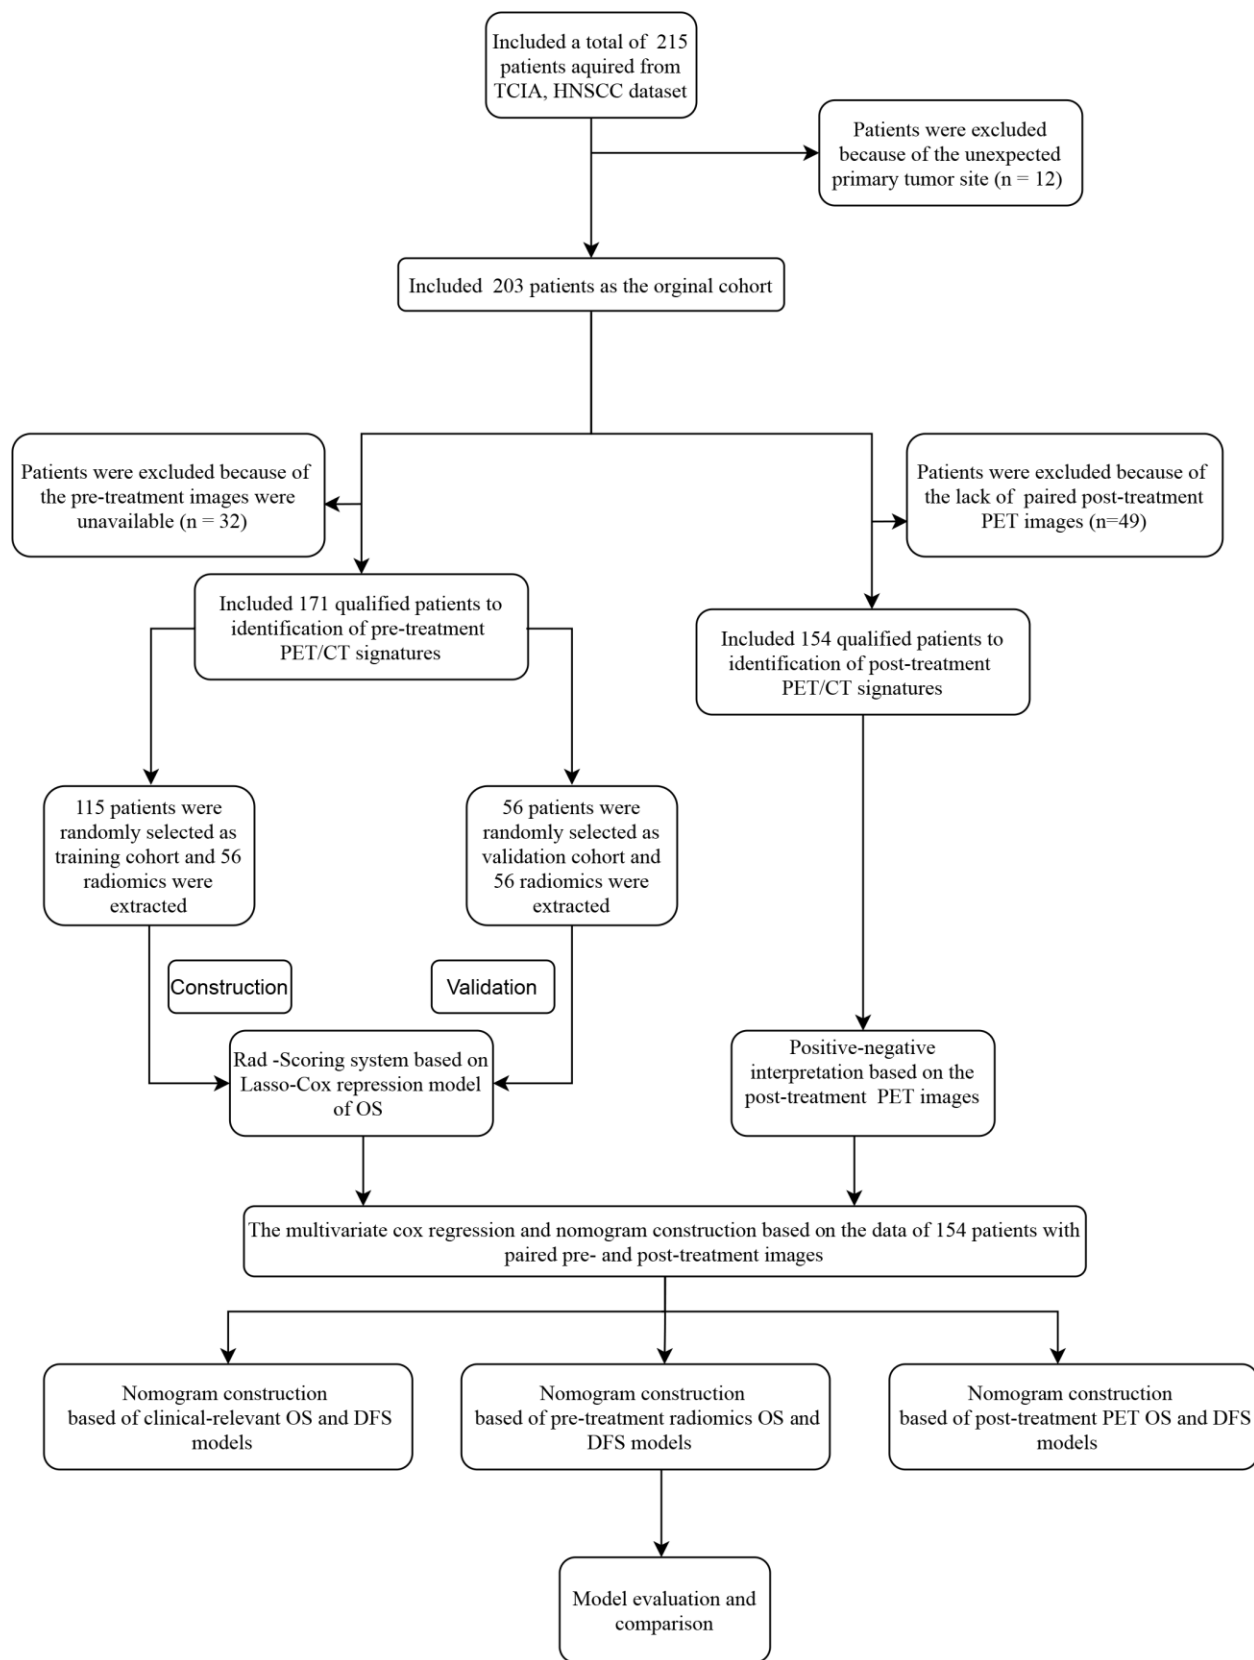

Supplementary Figure 2. The flow chart of the study design.
